# Supplementary material for: C2H4 synthesis through catalytic C2H2 hydrogenation in post-CH4 plasma streams: performance of noble and non-noble catalysts
Source: Research Square preprint supplement (doi:10.21203/rs.3.rs-6778138/v1), 2025-06-13
Supplement: Supplementary file 1 [file 267a7f563ce71f2137c2cff5.docx]

**Supporting Information**

**C2H4 synthesis through catalytic C2H2 hydrogenation in post-CH4 plasma streams: performance of noble and non-noble catalysts**

Eduardo Morais, a, b * § Qian Chen, c § Rui Liu, c Yanhui Yi, c * and Annemie Bogaerts a, b *

*a PLASMANT, Department of Chemistry, University of Antwerp, Antwerp, Belgium*

*b Electrification Institute, University of Antwerp, Olieweg 97, 2020 Antwerp, Belgium*

*c State Key Laboratory of Fine Chemicals, Frontier Science Center for Smart Materials, School of Chemical Engineering, Dalian University of Technology, Dalian 116024, Liaoning, China*

§ Shared first authors

* Correspondence to:

Annemie Bogaerts: [annemie.bogaerts@uantwerpen.be](mailto:annemie.bogaerts@uantwerpen.be)

Eduardo Morais: [eduardo.morais@uantwerpen.be](mailto:eduardo.morais@uantwerpen.be)

Yanhui Yi: [yiyanhui@dlut.edu.cn](mailto:yiyanhui@dlut.edu.cn)

**S1. Quantitative analysis of reaction performance**

**Table S1.** Equations of standard curves for the quantitative analysis of reactants and products.

| **Substance** | **Peak area range** | **Method** | **Standard curve*** |
| --- | --- | --- | --- |
| C2H2 | ≤ 689000 | GC | y = 6889089x |
| ＞ 689000 | GC | y = 1.03425e7x - 352312 |
| C2H4 | ≤1800000 | GC | y = 1.2492e7x |
| ＞1800000 | GC | y = 5684631x + 1002081 |
| C2H6 | ≤1250000 | GC | y = 1.28127ex |
| ＞1250000 | GC | y = 4039375x + 992671 |
| CH4 | ＞1270000 | GC | y = 2484210x + 653345 |

* (x refers to the concentration of samples, y refers to the peak area of samples)

**S2. Calculation of number of active sites**

The number of active sites is an essential input for the micro-kinetic model. It was estimated for each metal catalyst using the dispersion coefficient of the active metal particles (measured via the CO chemisorption experiment) and the total mass of the catalyst. The dispersion coefficient represents the fraction of metal atoms exposed at the surface, considering the ratio between the number of surface metal atoms and the total number of atoms in the material. Below, the calculation of the active sites for the 0.25% Pd/γ-Al2O3 catalyst with a dispersion coefficient of 10.86% is shown. This calculation uses the Pd atomic weight (106.42 g/mol) and mass of Pd used in the experiments, which is equal to 0.25% of 1.4 g of packing material.

|  |  |
| --- | --- |
|  |  |
|  |  |
|  |  |

The number of active sites of the Pt, Ni and Cu catalysts was calculated using the approach presented above for the Pd catalyst. The results are shown below:

**S3. Solving the model**

A version of the in-house python script used to solve the model is quoted below.

___________________________________________________________________________

import re

import sys

import os

import numpy as np

from ase.symbols import string2symbols

from ase.thermochemistry import HarmonicThermo

from scipy.integrate import solve_ivp

from copy import deepcopy

import matplotlib.pyplot as plt

# Constants

N_A = 6.02214076e23

kb = 1.380649e-23

def load_data(filename, separator):

"""Loads data from a file into a dictionary."""

with open(filename, 'r') as f:

data = [line.strip() for line in f if line.strip()]

labels = data[0].split(separator)

values = [line.split(separator) for line in data[1:]]

return {label: [value[i] for value in values] for i, label in enumerate(labels)}

def get_surf_reactions(rxn_file, site_types, surf_elements):

"""Extracts surface reactions from a file and validates them."""

rxn_list = [re.sub(r'\s|\'|,|_g|\[|\]', '', rxn.replace('<->', '->')) for rxn in open(rxn_file)]

for rxn in rxn_list:

sections = [s.split('+') for s in rxn.split('->')]

# Check site and atom balance

for site in site_types:

if not all(s.count(site) == s.count(site) for s in sections):

sys.exit(f'Site {site} is not balanced in reaction {rxn}')

for atom in surf_elements:

if not all(string2symbols(s).count(atom) == string2symbols(s).count(atom) for s in sections):

sys.exit(f'Atom balance incorrect for {atom} in reaction {rxn}')

return rxn_list

def get_species(rxn_list, site_types):

"""Extracts gas, surface, and adsorbed species from reaction list."""

gas_spec, surf_spec, ads_spec = [], [], []

for rxn in rxn_list:

for section in rxn:

for spec in section:

if '_' not in spec and spec not in gas_spec:

gas_spec.append(spec)

elif spec[-1] in site_types and spec not in surf_spec:

surf_spec.append(spec)

elif not spec[-1] in site_types:

sys.exit(f'Error: incorrect species {spec} in reaction {rxn}')

for spec in surf_spec:

if '-' not in spec and '*' not in spec:

ads_spec.append(spec)

return gas_spec, surf_spec, ads_spec

def get_energies(energy_file, gas_spec, surf_spec):

"""Loads energies from a file and filters for relevant species."""

energy_data = load_data(energy_file, '\t')

g_energ = {gas: float(energy_data['formation_energy'][i]) for gas in gas_spec for i in range(len(energy_data['species_name'])) if gas == energy_data['species_name'][i] and energy_data['site_name'][i] == 'gas'}

s_energ = {spec: float(energy_data['formation_energy'][i]) for spec in surf_spec for i in range(len(energy_data['species_name'])) if spec.split('_')[0] == energy_data['species_name'][i] and energy_data['site_name'][i] == spec.split('_')[1]}

return g_energ, s_energ

def shomate_eq(params, T):

"""Calculates enthalpy, entropy, and heat capacity using the Shomate equation."""

A, B, C, D, E, F, G, H = params

t = T / 1000.0

H = A*t + (B/2.0)*t**2 + (C/3.0)*t**3 + (D/4.0)*t**4 - E/t + F - H

S = A*np.log(t) + B*t + (C/2.0)*t**2 + (D/3.0)*t**3 - E/(2.0*t**2) + G

Cp = A + B*t + C*t**2 + D*t**3 + E/(t**2)

return H, S, Cp

def get_corrected_energies(temp, gas_spec, g_energ, shomate_params):

"""Corrects gas energies based on temperature and Shomate parameters."""

corr_energ = {}

for gas in gas_spec:

temp_key = next((k for k in shomate_params[gas].keys() if temp >= float(k.split('-')[0]) and temp <= float(k.split('-')[1])), None)

if temp_key is None:

sys.exit(f'Error: missing Shomate parameters for {gas} at {temp} K.')

dH, dS, Cp = shomate_eq(shomate_params[gas][temp_key], temp)

corr_energ[gas] = g_energ[gas] + dH # Simplified to only use dH for correction

return corr_energ

def calc_surf_rate_cst(T, rxn_list, corr_energ):

"""Calculates surface reaction rate constants."""

kb = 1.380649e-23 # J/K

h = 6.62607015e-34 # J*s

R = 8.314462618 # J/mol*K

k_rxn = []

for rxn in rxn_list:

Ea = max(corr_energ[spec] for spec in rxn) # Assuming a single activation energy for simplicity

k_rxn.append(kb * T / h * np.exp(-Ea / (R * T)))

return k_rxn

# ... other functions ...

# Main execution

if __name__ == '__main__':

# User input for temperatures

temperatures_C = [int(temp) for temp in input("Enter the temperatures in Celsius you want to investigate, separated by commas: ").split(',')]

# Loop over each temperature

for Temp_C in temperatures_C:

temperature = Temp_C + 273.15 # Convert to Kelvin

dir_name = str(Temp_C)

os.makedirs(dir_name, exist_ok=True)

os.chdir(dir_name)

# User input (replace with actual values or provide instructions for user input)

catalyst = 'Pd'

gas_fraction_dict = {'H2': X, 'C2H2': Y, 'C2H4': Z, 'C2H6': W, 'CH4': V}

coverage_dict = {'*_s': 1.0} # Initial coverages

total_pressure = 1.0 # Total pressure in reactor (bar)

sites_per_cc = a # Number of catalyst sites per cubic cm

vol_cstr = b # Gas volume in CSTR (m^3)

vol_flow_in = c # Volumetric flow into reactor (m^3/s)

# Time settings

t_first = 1.0e-20 # The time (s) that marks the end of the first step.

t_final = 1.0e20 # The final time (s), after this the simulation is stopped.

num_steps = 5 # Number of steps after which to write output.

abs_tol = 1e-30 # Absolute tolerance of ODE solver.

rel_tol = 1e-5 # Relative tolerance of ODE solver.

solve_from_start = False # Solve each time point from start rather than from

# the previous time point

def calc_dydt(t, act_ode):

dens_ode = act_ode[:len(gasses)]

cov_ode = act_ode[len(gasses):]

pres_ode = [density_to_pressure(dens, temperature) for dens in dens_ode]

dens_total = sum(dens_ode)

rate_for, rate_rev = calc_rates(pres_ode, cov_ode, all_species, rate_cst, coeff_loss, coeff_form)

rate_rxn = [for_rate - rev_rate for for_rate, rev_rate in zip(rate_for, rate_rev)]

dydt = [0.]*len(all_species)

for i in range(len(gasses)):

for j in range(len(rate_cst_gas)):

dydt[i] += coeff_form[j][i] * rate_rxn[j] - coeff_loss[j][i] * rate_rxn[j]

flow_correction = sum(dydt[:len(gasses)])

for i in range(len(gasses)):

dydt[i] += flow_in * gas_fraction_in[i] / vol_cstr * 1.0e-6

dydt[i] -= (flow_in / vol_cstr * 1.0e-6 + flow_correction) * gas_fraction_out[i]

# Coverages

for i in range(len(gasses), len(all_species)):

for j in range(len(rate_cst_gas), len(rate_cst)):

dydt[i] += coeff_form[j][i] * rate_rxn[j] - coeff_loss[j][i] * rate_rxn[j]

return dydt

# Start simulation: loop over time intervals

step = 0

output_idx = 0

t_start = 0.0

t_step = t_first

while t_start <= t_final:

# Check if simulation progresses and increase t_step

if t_step == t_start:

t_step *= 10.0**(1.0/5.0)

elif t_step != t_first:

sys.exit('Simulation stuck at t = {}, simulation terminated'.format(t_start))

if solve_from_start:

# Solve system of ODE's

sol = solve_ivp(calc_dydt, [0.0, t_step], activity_start, \

method = 'BDF', atol = abs_tol, rtol = rel_tol)

act_out = np.transpose(sol.y)

time = sol.t

if not sol.success:

print(sol.message)

else:

# Solve system of ODE's

sol = solve_ivp(calc_dydt, [0.0, t_step - t_start], activity, \

method = 'BDF', atol = abs_tol, rtol = rel_tol)

act_out = np.transpose(sol.y)

time = sol.t

for i in range(len(time)):

time[i] += t_start

if not sol.success:

print(sol.message)

# Add your own writing functions as needed

___________________________________________________________________________________________

**S4. Thermodynamic data**

**Table S2.** Shomate parameters in different gas temperature ranges for the gas species considered in the model.

| **Species** | **Shomate parameters** |
| --- | --- |
|
| H2 (g) | T = 298 – 1000 K: 33.066178, -11.363417, 11.432816, -2.772874, -0.158558, -9.980797, 172.707974, 0.00  T = 1000 – 2500 K: 18.563083, 12.257357, -2.859786, 0.268238, 1.977990, -1.147438, 156.288133, 0.00  T = 2500 – 6000 K: 43.413560, -4.293079, 1.272428, -0.096876, -20.533862, -38.515158, 162.081354, 0 |
| CH4 (g) | T = 298 – 1300 K: -0.703029, 108.4773, -42.52157, 5.862788, 0.678565, -76.84376, 158.7163, -74.87310  T = 1300 – 6000 K: 85.81217, 11.26467, -2.114146, 0.138190, -26.42221, -153.5327, 224.4143, -74.87310 |
| C2H2 (g) | T = 298 – 1100 K: 40.68697, 40.73279, -16.17840, 3.66974, -0.658411, 210.7067, 235.0052, 226.7314  T = 1100 – 6000 K: 67.47244, 11.75110, -2.021470, 0.136195, -9.806418, 185.4550, 253.5337, 226.7314 |
| C2H4 (g) | T = 298 – 1200 K: -6.387880, 184.4019, -112.9718, 28.49593, 0.315540, 48.17332, 163.1568, 52.46694  T = 1200 – 6000 K: 106.5104, 13.73260, -2.628481, 0.174595, -26.14469, -35.36237, 275.0424, 52.46694 |
| C2H6 (g) | T = 298 – 6000 K: 9.273094, 150.784214, -22.893323, -14.019576, 0.119966, -8.834320, 197.281764, 0.00 |

**Table S3.** Enthalpies of formation [in eV] of all species and transition states included in the model for the Pd, Pt, Ni and Cu surfaces with close-packed metallic facet: FCC (111). This data was calculated with respect to CH4 formation enthalpies at 273 K and 1 bar.Rotational and vibrational wavenumbers [in cm-1] of species included in the model, calculated via DFT for a (111) metallic facet of any given metal surface.

| **Species** | **Formation enthalpy (eV)** | | | | **Rotational and vibrational wavenumbers (cm -1)** |
| --- | --- | --- | --- | --- | --- |
| **Pd** | **Pt** | **Ni** | **Cu** |
| H2 (g) | 0.09 | 0.09 | 0.09 | 0.09 | 4400 |
| CH4 (g) | 0.00 | 0.00 | 0.00 | 0.00 | 23.55; 27.76; 33.59; 53.41; 57.90; 60.18; 1325.84; 1326.21; 1326.31; 1544.53; 1544.62; 3007.17; 3113.83; 3113.90; 3114.09 |
| C2H2 (g) | 4.41 | 4.41 | 4.41 | 4.41 | 30.92; 26.74; 0.40; 0.26; 2.08; 620.84; 620.98; 747.31; 748.50; 2056.72; 3449.37; 3551.11 |
| C2H4 (g) | 2.33 | 2.33 | 2.33 | 2.33 | 40.26; 14.03; 31.62; 42.16; 55.68; 58.66; 822.31; 942.23; 952.39; 1044.95; 1227.52; 1360.02; 1459.42; 1655.10; 3101.08; 3113.78; 3172.25; 3200.26 |
| C2H6 (g) | 0.76 | 0.76 | 0.76 | 0.76 | 12.11; 33.91; 43.50; 49.60; 50.23; 304.83; 813.70; 814.55; 981.82; 1203.26; 1203.43; 1392.72; 1400.95; 1484.23;1484.43; 1488.69; 1489.05; 2999.87; 3001.62; 3048.08; 3048.98; 3072.98; 3073.90 |
| H* | -0.36 | -0.31 | -0.34 | -0.06 | 668.6, 692.8, 1013.0 |
| HCCH* | 2.74 | 2.29 | 2.34 | 3.51 | 255.7, 274.2, 288.7, 517.8, 596.0, 754.9, 850.1, 982.4, 1136.4, 1298.6, 3130.2, 3150.4 |
| H2CCH* | 2.42 | 1.89 | 2.69 | 3.08 | 166.2, 184.7, 347.6, 425.9, 434.7, 489.6, 642.8, 868.7, 967.1, 1025.9, 1100.9, 1392.9, 3011.7, 3024.6, 3080.2 |
| H2CCH2* | 1.57 | 1.28 | 1.8 | 2.12 | 104.0, 114.5, 153.2, 370.2, 479.9, 596.0, 800.9, 903.3, 934.8, 1000.1, 1088.8, 1201.0, 1412.3, 1451.0, 3064.9, 3074.6, 3139.9, 3164.9 |
| H3CCH2* | 1.31 | 0.99 | 1.57 | 1.88 | 37.1, 53.2, 58.9, 168.6, 222.6, 364.6, 554.9, 885.6, 925.1, 979.2, 1111.4, 1218.7, 1376.0, 1424.4, 1458.2, 1461.5, 2985.1, 3041.5, 3058.5, 3082.6, 3102.0 |
| CH3* | 0.68 | 0.36 | 0.75 | 1.11 | 53.2, 83.1, 85.5, 441.2, 671.1, 675.1, 1144.5, 1405.8, 1410.7, 3018.1, 3123.0, 3124.6 |
| CH2* | 1.37 | 1.03 | 1.31 | 2.11 | 75.8, 350.0, 521.8, 526.7, 604.9, 793.6, 1335.7, 2974.6, 3053.6 |
| CH* | 1.39 | 0.91 | 1.41 | 2.67 | 455.7, 462.2, 588.0, 788.0, 788.8, 3093.1 |
| CC* | 4.92 | 4.82 | 4.11 | 4.98 | 260.5, 318.6, 340.4, 385.5, 425.1, 1506.6 |
| C* | 2.14 | 1.86 | 2.36 | 3.92 | 450.9, 584.8, 641.2 |
| CHC* | 3.68 | 3.47 | 3.14 | 4.21 | 64.5, 66.1, 183.9, 185.5, 381.5, 616.2, 619.4, 2003.5, 3472.2 |
| CH2C* | 2.63 | 2.06 | 2.53 | 3.61 | 83.1, 133.9, 150.0, 287.9, 313.7, 348.4, 865.4, 938.8, 1359.0, 1523.6, 3078.6, 3148.0 |
| CH3C* | 1.67 | 1.22 | 1.78 | 3.16 | 101.6, 127.4, 129.9, 364.6, 369.4, 379.1, 948.5, 950.1, 1079.2, 1363.1, 1422.0, 1426.8, 3005.2, 3064.9, 3068.1 |
| CH3CH* | 1.91 | 1.56 | 1.95 | 2.83 | 109.7, 110.5, 160.5, 243.6, 346.0, 430.7, 731.5, 939.6, 979.2, 1002.5, 1213.1, 1367.9, 1433.2, 1445.3, 2966.5, 3000.4, 3044.7, 3066.5 |
| *H–H* | 0.21 | 0.28 | 0.39 | 0.95 | 668.6, 668.6, 692.8, 692.8, 1013.0, 1013.0 |
| *HCCH–H* | 3.26 | 3.13 | 3.38 | 4.73 | 255.7, 274.2, 288.7, 517.8, 596.0, 668.6, 692.8, 754.9, 850.1, 982.4, 1013.0, 1136.4, 1298.6, 3130.2, 3150.4 |
| *H2CCH–H* | 2.98 | 2.62 | 2.73 | 3.95 | 166.2, 184.7, 347.6, 425.9, 434.7, 489.6, 642.8, 668.6, 692.8, 868.7, 967.1, 1013.0, 1025.9, 1100.9, 1392.9, 3011.7, 3024.6, 3080.2 |
| *H2CCH2–H* | 2.12 | 1.94 | 2.15 | 2.62 | 104.0, 114.5, 153.2, 370.2, 479.9, 596.0, 668.6, 692.8, 800.9, 903.3, 934.8, 1000.1, 1013.0, 1088.8, 1201.0, 1412.3, 1451.0, 3064.9, 3074.6, 3139.9, 3164.9 |
| *H3CCH2–H* | 1.77 | 1.68 | 2.13 | 2.80 | 37.1, 53.2, 58.9, 168.6, 222.6, 364.6, 554.9, 668.6, 692.8, 885.6, 925.1, 979.2, 1013.0, 1111.4, 1218.7, 1376.0, 1424.4, 1458.2, 1461.5, 2985.1, 3041.5, 3058.5, 3082.6, 3102.0 |
| *CH3–H* | 1.29 | 1.05 | 1.35 | 1.89 | 53.2, 83.1, 85.5, 441.2, 668.6, 671.1, 675.1, 692.8, 1013.0, 1144.5, 1405.8, 1410.7, 3018.1, 3123.0, 3124.6 |
| *CH2–H* | 1.81 | 1.35 | 1.87 | 3.00 | 75.8, 350.0, 521.8, 526.7, 604.9, 668.6, 692.8, 793.6, 1013.0, 1335.7, 2974.6, 3053.6 |
| *CH–H* | 2.16 | 1.53 | 2.23 | 3.81 | 455.7, 462.2, 588.0, 668.6, 692.8, 788.0, 788.8, 1013.0, 3093.1 |
| *CH3–CH3* | 3.5 | 3.77 | 3.21 | 4.26 | 53.2, 53.2, 83.1, 83.1, 85.5, 85.5, 441.2, 441.2, 671.1, 671.1, 675.1, 675.1, 1144.5, 1144.5, 1405.8, 1405.8, 1410.7, 1410.7, 3018.1, 3018.1, 3123.0, 3123.0, 3124.6, 3124.6 |
| *CH3–CH2* | 3.49 | 3.07 | 3.59 | 4.53 | 53.2, 75.8, 83.1, 85.5, 350.0, 441.2, 521.8, 526.7, 604.9, 671.1, 675.1, 793.6, 1144.5, 1335.7, 1405.8, 1410.7, 2974.6, 3018.1, 3053.6, 3123.0, 3124.6 |
| *CH2–CH2* | 3.74 | 3.58 | 3.17 | 4.20 | 75.8, 75.8, 350.0, 350.0, 521.8, 521.8, 526.7, 526.7, 604.9, 604.9, 793.6, 793.6, 1335.7, 1335.7, 2974.6, 2974.6, 3053.6, 3053.6 |
| *CH2–CH* | 3.97 | 3.55 | 3.96 | 5.23 | 75.8, 350.0, 455.7, 462.2, 521.8, 526.7, 588.0, 604.9, 788.0, 788.8, 793.6, 1335.7, 2974.6, 3053.6, 3093.1 |
| *CH–CH* | 4.45 | 3.9 | 4.45 | 6.25 | 455.7, 455.7, 462.2, 462.2, 588.0, 588.0, 788.0, 788.0, 788.8, 788.8, 3093.1, 3093.1 |
| *H–C2H5* | 3.1 | 3.12 | 3.16 | 3.36 | 37.1, 53.2, 58.9, 168.6, 222.6, 364.6, 554.9, 668.6, 692.8, 885.6, 925.1, 979.2, 1013.0, 1111.4, 1218.7, 1376.0, 1424.4, 1458.2, 1461.5, 2985.1, 3041.5, 3058.5, 3082.6, 3102.0 |
| *CH3CH–H* | 2.44 | 1.87 | 2.38 | 3.55 | 109.7, 110.5, 160.5, 243.6, 346.0, 430.7, 668.6, 692.8, 731.5, 939.6, 979.2, 1002.5, 1013.0, 1213.1, 1367.9, 1433.2, 1445.3, 2966.5, 3000.4, 3044.7, 3066.5 |
| *CH2–HCH* | 3.81 | 3.46 | 3.83 | 4.73 | 75.8, 75.8, 350.0, 350.0, 521.8, 521.8, 526.7, 526.7, 604.9, 604.9, 793.6, 793.6, 1335.7, 1335.7, 2974.6, 2974.6, 3053.6, 3053.6 |
| *H–CH2CH* | 2.94 | 2.11 | 3.26 | 4.63 | 166.2, 184.7, 347.6, 425.9, 434.7, 489.6, 642.8, 668.6, 692.8, 868.7, 967.1, 1013.0, 1025.9, 1100.9, 1392.9, 3011.7, 3024.6, 3080.2 |
| *CH3C–H* | 2.4 | 1.84 | 2.21 | 3.78 | 101.6, 127.4, 129.9, 364.6, 369.4, 379.1, 668.6, 692.8, 948.5, 950.1, 1013.0, 1079.2, 1363.1, 1422.0, 1426.8, 3005.2, 3064.9, 3068.1 |
| *CH3–CH* | 3.29 | 2.8 | 3.38 | 4.53 | 53.2, 83.1, 85.5, 441.2, 455.7, 462.2, 588.0, 671.1, 675.1, 788.0, 788.8, 1144.5, 1405.8, 1410.7, 3018.1, 3093.1, 3123.0, 3124.6 |
| *H–CH2C* | 3.21 | 2.53 | 3.34 | 5.07 | 83.1, 133.9, 150.0, 287.9, 313.7, 348.4, 668.6, 692.8, 865.4, 938.8, 1013.0, 1359.0, 1523.6, 3078.6, 3148.0 |
| *CH3–C* | 4.24 | 3.61 | 4.12 | 5.83 | 53.2, 83.1, 85.5, 441.2, 450.9, 584.8, 641.2, 671.1, 675.1, 1144.5, 1405.8, 1410.7, 3018.1, 3123.0, 3124.6 |
| *CH2C–H* | 3.89 | 3.48 | 3.95 | 4.98 | 83.1, 133.9, 150.0, 287.9, 313.7, 348.4, 668.6, 692.8, 865.4, 938.8, 1013.0, 1359.0, 1523.6, 3078.6, 3148.0 |
| *H–CHC | 4.17 | 3.39 | 4.01 | 5.41 | 64.5, 66.1, 183.9, 185.5, 381.5, 616.2, 619.4, 668.6, 692.8, 1013.0, 2003.5, 3472.2 |
| *CH2–C* | 4.78 | 3.99 | 4.88 | 6.86 | 75.8, 350.0, 450.9, 521.8, 526.7, 584.8, 604.9, 641.2, 793.6, 1335.7, 2974.6, 3053.6 |
| *CHC–H* | 4.26 | 3.42 | 3.66 | 5.53 | 64.5, 66.1, 183.9, 185.5, 381.5, 616.2, 619.4, 668.6, 692.8, 1013.0, 2003.5, 3472.2 |
| *CC–H* | 5.46 | 4.61 | 5.18 | 6.46 | 260.5, 318.6, 340.4, 385.5, 425.1, 668.6, 692.8, 1013.0, 1506.6 |
| *CH–C* | 5.38 | 4.2 | 4.69 | 7.62 | 450.9, 455.7, 462.2, 584.8, 588.0, 641.2, 788.0, 788.8, 3093.1 |
| *C–C* | 6.37 | 5.34 | 5.86 | 8.92 | 260.5, 318.6, 340.4, 385.5, 425.1, 1506.6 |
| *C–H* | 2.81 | 2.03 | 2.9 | 4.85 | 455.7, 462.2, 588.0, 788.0, 788.8, 3093.1 |

**S5. Experimental results of C2H2 hydrogenation**

***(1) Pd/γ-Al2O3 catalyst***

We performed experiments at different temperatures, as explained in Section 2.3 of the main paper. In Table S4, the temperatures of 82, 83 90, 95, 100 and 105 oC were realised by the reaction heating, without external heating from the furnace, while the temperatures of 110, 130, 150, 200, 250, 300, 350 and 400 oC were reached using the furnace. The C2H4 selectivity at 82 and 83 oC is much higher than that of C2H6, but it decreases drastically with the temperature rising to 90 °C. It remains very low up to 200 °C, but from 250 oC, the C2H4 selectivity and yield increase with rising temperature, which indicates that C2H4 is more easily produced at higher temperature. Besides, the C2H2 conversion increases drastically from 27% at 82 °C to 99% at 83 °C and 90 °C, and remains nearly 100% with rising temperature up to 350 °C. When the temperature exceeds 350 oC, the C2H2 conversion drops to 90.5%, possibly due to the formation of oligomeric by-products.

**Table S4.** Catalytic performance of 0.25% Pd/γ-Al2O3.

| Catalyst | Pre-treatment  conditions | T (oC) | C2H2 Conversion (%) | C2H4 Selectivity (%) | C2H6 Selectivity (%) | C2H4 Yield  （%） |
| --- | --- | --- | --- | --- | --- | --- |
| 0.25% Pd/γ-Al2O3  Feed gas =100 ml/min  H2 : CH4 : C2H2 = 2 : 1 : 1 | 2 hours reduction at 200oC by 50 ml/min H2 | 82 | 27.1 | 63.1 | 13.4 | 8.81 |
| 83 | 99.0 | 62.5 | 15.5 | 61.9 |
| 90 | 98.9 | 2.07 | 82.8 | 2.05 |
| 95 | 99.9 | 2.06 | 83.8 | 2.06 |
| 100 | 100 | 2.35 | 84.3 | 2.35 |
| 105 | 100 | 2.76 | 84.0 | 2.76 |
| 110 | 100 | 3.13 | 83.7 | 3.13 |
| 130 | 100 | 3.58 | 83.4 | 3.58 |
| 150 | 100 | 4.16 | 83.7 | 4.16 |
| 200 | 100 | 0.7 | 84.1 | 0.70 |
| 250 | 100 | 7.73 | 79.9 | 7.73 |
| 300 | 100 | 17.6 | 65.3 | 17.6 |
| 350 | 99.5 | 33.1 | 36.8 | 32.9 |
| 400 | 90.5 | 47.9 | 10.0 | 43.4 |

***(2) Pt/γ-Al2O3 catalyst***

The temperatures of 80, 100 and 130 °C were realised by the reaction heating, without external heating from the furnace, while the temperatures of 200, 250, 300, 400 and 500 °C were reached using the furnace. The C2H4 selectivity remains at 0% from 80 to 200 °C, and the C2H2 conversion remains 100% from 80 to 300 °C. From 250 °C, the C2H4 selectivity increases with rising temperature, and the best C2H4 selectivity (50.1%) is obtained at 400 °C. However, the C2H2 conversion, the C2H4 and C2H6 selectivity all drop due to the influence of by-product formation from 500 °C, as seen in Table S5.

**Table S5:** Catalytic performance of 0.25% Pt/γ-Al2O3.

| Catalyst | Pre-treatment  condition | T (oC) | C2H2 Conversion (%) | C2H4 Selectivity (%) | C2H6 Selectivity (%) | C2H4 Yield  （%） |
| --- | --- | --- | --- | --- | --- | --- |
| 0.25% Pt/γ-Al2O3  Feed gas =100 ml/min  H2 : CH4 : C2H2 = 2 : 1 : 1 | 2h reduction at 200oC by 50 ml/min H2 | 80 | 100 | 0 | 86.1 | 0 |
| 100 | 100 | 0 | 86.6 | 0 |
| 130 | 100 | 0 | 85.9 | 0 |
| 200 | 100 | 0 | 85.1 | 0 |
| 250 | 100 | 1.21 | 84.7 | 1.21 |
| 300 | 100 | 3.28 | 80.9 | 3.28 |
| 400 | 50.5 | 50.1 | 14.3 | 25.3 |
| 500 | 44.4 | 11.4 | 4.11 | 5.06 |

***(3) Ni/γ-Al2O3 catalyst***

For this Ni catalyst (unlike for Pd and Pt), all temperatures were reached through heating using the furnace. The best C2H4 selectivity is obtained at 160 oC (66.7%), but it corresponds to a low C2H2 conversion; see Table S6. The C2H2 conversion drastically rises from 6% at 180°C to 100% at 190 oC, and subsequently it declines again, which indicates the formation of carbon deposition on the catalyst. The C2H6 selectivity remains below 17% and the C2H4 selectivity is always above that of C2H6 in the entire temperature range.

**Table S6:** Catalytic performance of 3% Ni/γ-Al2O3.

| Catalyst | Pre-treatment  condition | T (oC) | C2H2 Conversion (%) | C2H4 Selectivity (%) | C2H6 Selectivity (%) | C2H4 Yield  （%） |
| --- | --- | --- | --- | --- | --- | --- |
| 3% Ni/γ-Al2O3  Feed gas =100 ml/min  H2 : CH4 : C2H2 = 2 : 1 : 1 | 3h reduction at 600oC by 50 ml/min H2 | 160 | 4.76 | 66.7 | 14.8 | 3.17 |
| 165 | 4.40 | 58.6 | 15.3 | 2.58 |
| 170 | 4.05 | 61.2 | 16.9 | 2.48 |
| 180 | 5.93 | 54.8 | 14.4 | 3.25 |
| 190 | 100 | 34.9 | 14.9 | 34.9 |
| 200 | 94.9 | 40.2 | 10.6 | 38.2 |
| 250 | 58.8 | 45.1 | 8.47 | 26.5 |
| 300 | 12.5 | 44.1 | 6.12 | 5.51 |

***(4) Cu/γ-Al2O3 catalyst***

All temperatures investigated for this Cu catalyst were reached through heating using the furnace. The best C2H4 selectivity is obtained at 170 oC (38.8%) and drops only slightly upon rising temperature (35.5% at 200 oC); see Table S7. Additionally, the C2H6 selectivity remains between 1 and 6% across the investigated temperature range. The C2H2 conversion drastically increases between 140 °C and 150 °C, followed by a more gradual rise with increasing temperature until 180 oC, when it peaks at 99.6 %. Subsequently, the C2H2 conversion begins to decline, which indicates again formation of by-products on the catalyst.

**Table S7:** Catalytic performance of 3% Cu/γ-Al2O3.

| Catalyst | Pre-treatment  condition | T (oC) | C2H2 Conversion (%) | C2H4 Selectivity (%) | C2H6 Selectivity (%) | C2H4 Yield  （%） |
| --- | --- | --- | --- | --- | --- | --- |
| 3% Cu/γ-Al2O3  Feed gas =100 ml/min  H2 : CH4 : C2H2 = 2 : 1 : 1 | 2h reduction at 400oC by 50 ml/min H2 | 140 | 7.79 | 23.2 | 5.56 | 1.81 |
| 150 | 77.4 | 36.2 | 2.16 | 28.0 |
| 160 | 81.0 | 37.8 | 1.87 | 30.6 |
| 170 | 99.6 | 38.8 | 4.04 | 38.6 |
| 180 | 99.6 | 38.6 | 3.12 | 38.5 |
| 190 | 99.3 | 35.3 | 2.75 | 35.1 |
| 200 | 97.5 | 35.5 | 2.88 | 34.6 |
